# Supplementary material for: Anti-Ballistic Performance of PPTA/UHMWPE Laminates
Source: MDPI journal article supplement (doi:10.3390/polym15102281), 2023-05-12
Supplement: s1 [file s1]

Supporting information

# Anti-ballistic performance of PPTA/UHMWPE laminates

Long Zhu <sup>1</sup>, Weixiao Gao <sup>1</sup>, Dmitriy A. Dikin <sup>1</sup>, Simona Percec <sup>2</sup>, Fei Ren <sup>1,\*</sup>

1 Department of Mechanical Engineering, Temple University, Philadelphia, PA 19122, USA; long.zhu@temple.edu (L.Z.); weixiao.gao@temple.edu (W.G.); ddikin@temple.edu (D.A.D.)

2 Temple Materials Institute, Temple University, Philadelphia, PA 19122, USA; simona.percec@temple.edu

\* Correspondence: renfei@temple.edu

**Table S1.** Comparison of the properties of PPTA fabric and UHMWPE film.

| Properties                                                            | PPTA fabric   | UHMWPE film        |
|-----------------------------------------------------------------------|---------------|--------------------|
| Density (g cm <sup>-3</sup> )                                         | 1.44          | 0.94               |
| Tensile modulus (GPa)                                                 | 59 - 124      | 0.2 - 1.2          |
| Tensile strength (MPa)                                                | 2760          | 20 - 40            |
| Coefficient of thermal expansion (×10 <sup>-6</sup> K <sup>-1</sup> ) | -2 Along Axis | 130 - 200          |
| Specific heat (J K <sup>-1</sup> kg <sup>-1</sup> )                   | 1400          | 1900               |
| Thermal conductivity (W m <sup>-1</sup> K <sup>-1</sup> )             | 0.04 @23°C    | 0.42 – 0.51 @ 23°C |
| Upper working temperature (C)                                         | 180 - 245     | 55 - 95            |

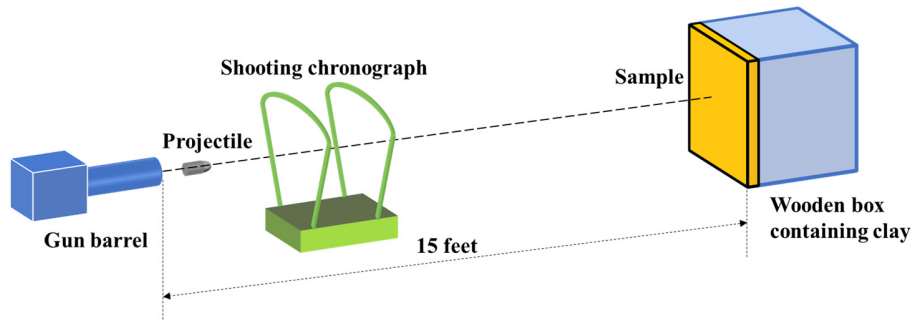

**Figure S1.** Schematic of the experimental setup for the ballistic testing.

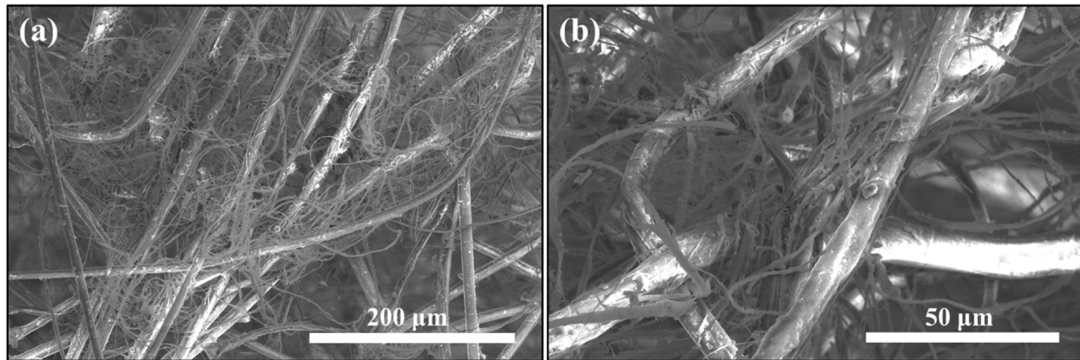

**Figure S2.** SEM images of the PPTA fibers captured on the exit side of the laminate sample (u)PE(9)-(5)KF(8) around a completely penetrated hole.
